# Supplementary material
Source: Springer Nature journal article supplement (https://www.springermedizin.de/resource/supplementary/12879_2010_1507_MOESM5_ESM.pdf/9442702)
Supplement: MOESM5 [file 9442702]

Incremental cost-effectiveness ratio  
(I\$/DALY averted)

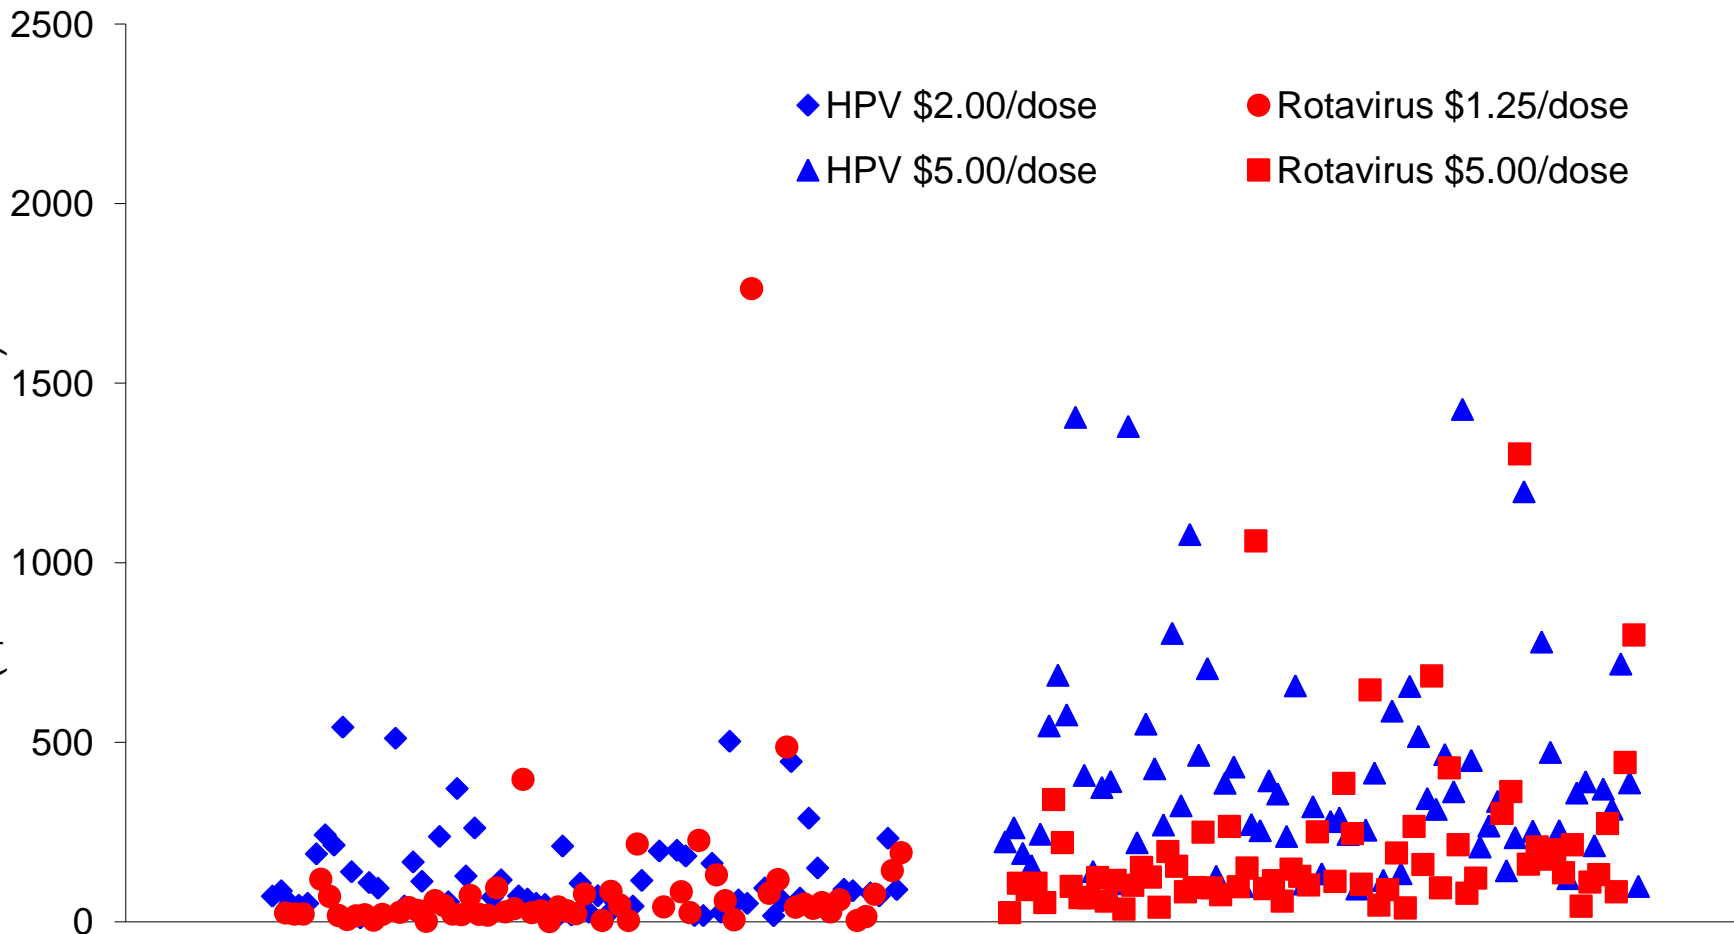

Per-dose cost, US\$

1.50 (Rotavirus)

5.00

2.00 (HPV)

(Rotavirus/HPV)

Cost per vaccinated individual, I\$

10.00

25.00
